# Supplementary material
Source: Research Square preprint supplement (doi:10.21203/rs.3.rs-8969021/v1)
Supplement: Supplementary file 1 [file fbe3e94c98b39111cd342180.docx]

**DIETARY DIVERSITY QUESTIONNAIRE**

1. Yesterday, did you eat: Lettuce, Chinese cabbage, or cabbage?
    ( ) YES  ( ) NO
2. Yesterday, did you eat: Kale, broccoli, chicory, watercress, or spinach?
    ( ) YES  ( ) NO
3. Yesterday, did you eat: Pumpkin, carrot, sweet potato, or okra/*caruru*?
    ( ) YES  ( ) NO
4. Yesterday, did you eat: Papaya, mango, yellow melon, persimmon, or *pequi*?
    ( ) YES  ( ) NO
5. Yesterday, did you eat: Tomato, cucumber, zucchini, eggplant, chayote, or beetroot?
    ( ) YES  ( ) NO
6. Yesterday, did you eat: Orange, banana, apple, or pineapple?
    ( ) YES  ( ) NO
7. Yesterday, did you eat: Rice, pasta, polenta, couscous, or corn?
    ( ) YES  ( ) NO
8. Yesterday, did you eat: Beans, peas, lentils, or chickpeas?
    ( ) YES  ( ) NO
9. Yesterday, did you eat: Regular potato, cassava, yam, or taro?
    ( ) YES  ( ) NO
10. Yesterday, did you eat: Beef, pork, chicken, or fish?
     ( ) YES  ( ) NO
11. Yesterday, did you eat: Fried, boiled, or scrambled egg?
     ( ) YES  ( ) NO
12. Yesterday, did you drink: Milk?
     ( ) YES  ( ) NO
13. Yesterday, did you eat: Peanuts, cashew nuts, or Brazil nuts?
     ( ) YES  ( ) NO

**ULTRAPROCESSED FOOD CONSUMPTION QUESTIONNAIRE**

1. Yesterday, did you drink: Soda?
    ( ) YES  ( ) NO
2. Yesterday, did you drink: Boxed or canned fruit juice (like Del Valle or Tropicana)?
    ( ) YES  ( ) NO
3. Yesterday, did you drink: Powdered drink mix (like Tang or Ki suco)?
    ( ) YES  ( ) NO
4. Yesterday, did you drink: Chocolate-flavored beverage (like Toddynho or Toddy)?
    ( ) YES  ( ) NO
5. Yesterday, did you drink: Flavored yogurt?
    ( ) YES  ( ) NO
6. Yesterday, did you eat: Packaged savory snacks (like chips) or savory crackers?
    ( ) YES  ( ) NO
7. Yesterday, did you eat: Sweet cookies, filled cookies, or packaged mini cakes?
    ( ) YES  ( ) NO
8. Yesterday, did you eat: Chocolate, ice cream, gelatin, flan, or other packaged desserts?
    ( ) YES  ( ) NO
9. Yesterday, did you eat: Sausage, hot dog, bologna, or ham?
    ( ) YES  ( ) NO
10. Yesterday, did you eat: Sliced bread, hot dog bun, or hamburger bun?
     ( ) YES  ( ) NO
11. Yesterday, did you eat: Mayonnaise, ketchup, or mustard?
     ( ) YES  ( ) NO
12. Yesterday, did you eat: Margarine?
     ( ) YES  ( ) NO
13. Yesterday, did you eat: Instant noodles (like Miojo or Cup Noodles), powdered soup, frozen lasagna, or other ready-to-eat frozen meals?
     ( ) YES  ( ) NO
